# Supplementary material
Source: publisher figshare collection journal article supplement (https://sage.figshare.com/ndownloader/files/16257356)
Supplement: Supplementary file 1 [file 16257356]

Table 3. Raw data and scaled scores for features of CSESA implementation index at CSESA intervention schools

| **Sch.** |  | **Training** | |  | **Coaching** | |  | **School Planning** | |  | **Intervention Quality** | |  | **Teaming** | |  | **Student Planning** | |  | **Student Dosage** | |  | **Total Score** |
| --- | --- | --- | --- | --- | --- | --- | --- | --- | --- | --- | --- | --- | --- | --- | --- | --- | --- | --- | --- | --- | --- | --- | --- |
|  |  | ***Rawa*** | ***Scale*** |  | ***Raw*** | ***Scale*** |  | ***Raw*** | ***Scale*** |  | ***Raw*** | ***Scale*** |  | ***Raw*** | ***Scale*** |  | ***Raw*** | ***Scale*** |  | ***Raw*** | ***Scale*** |  |  |
| 1 |  | 10;4 | 3 |  | 104.5 | 1 |  | Yes | 3 |  | 2.47 | 2 |  | 3.64 | 2 |  | 1.00 | 3 |  | 1.96 | 2 |  | **2.15** |
| 2 |  | 10; 4 | 3 |  | 121.5 | 2 |  | Yes | 3 |  | 2.49 | 2 |  | 3.24 | 2 |  | 0.95 | 2 |  | 1.71 | 2 |  | **2.15** |
| 3 |  | 9; 4 | 3 |  | 135.5 | 2 |  | Yes | 3 |  | 2.39 | 2 |  | 4.46 | 3 |  | 1.00 | 3 |  | 1.72 | 2 |  | **2.31** |
| 4 |  | 10; 4 | 3 |  | 143.2 | 2 |  | Yes | 3 |  | 2.63 | 3 |  | 3.38 | 2 |  | 1.00 | 3 |  | 1.68 | 2 |  | **2.54** |
| 5 |  | 10; 4 | 3 |  | 166.3 | 2 |  | Yes | 3 |  | 2.48 | 2 |  | 4.08 | 3 |  | 1.00 | 3 |  | 1.92 | 2 |  | **2.31** |
| 6 |  | 10; 4 | 3 |  | 196.7 | 2 |  | Yes | 3 |  | 2.37 | 2 |  | 4.14 | 3 |  | 0.95 | 2 |  | 1.96 | 2 |  | **2.23** |
| 7 |  | 10; 4 | 3 |  | 199.0 | 2 |  | Yes | 3 |  | 2.31 | 2 |  | 3.15 | 2 |  | 0.96 | 2 |  | 1.55 | 2 |  | **2.15** |
| 8 |  | 10; 4 | 3 |  | 158.3 | 2 |  | Yes | 3 |  | 2.74 | 3 |  | 3.00 | 1 |  | 1.00 | 3 |  | 2.33 | 3 |  | **2.77** |
| 9 |  | 6; 4 | 1 |  | 138.7 | 2 |  | Yes | 3 |  | 2.16 | 2 |  | 3.34 | 2 |  | 1.00 | 3 |  | 1.09 | 1 |  | **1.77** |
| 10 |  | 10; 4 | 3 |  | 240.8 | 3 |  | Yes | 3 |  | 2.34 | 2 |  | 3.70 | 2 |  | 0.96 | 2 |  | 1.67 | 2 |  | **2.23** |
| 11 |  | 9; 3 | 2 |  | 87.0 | 1 |  | Yes | 3 |  | 2.46 | 2 |  | 3.75 | 2 |  | 1.00 | 3 |  | 1.24 | 1 |  | **1.77** |
| 12 |  | 4; 1 | 0 |  | 134.0 | 2 |  | Yes | 3 |  | 2.25 | 2 |  | 2.71 | 1 |  | 1.00 | 3 |  | 0.53 | 1 |  | **1.62** |
| 13 |  | 7; 3 | 2 |  | 96.5 | 1 |  | Yes | 3 |  | 2.04 | 2 |  | 3.43 | 2 |  | 1.00 | 3 |  | 0.86 | 1 |  | **1.77** |
| 14 |  | 4; 2 | 0 |  | 173.0 | 2 |  | Yes | 3 |  | 2.11 | 2 |  | 4.14 | 3 |  | 0.91 | 2 |  | 0.68 | 1 |  | **1.69** |
| 15 |  | 5; 2 | 1 |  | 94.3 | 1 |  | Yes | 3 |  | 2.39 | 2 |  | 4.04 | 3 |  | 1.00 | 3 |  | 1.32 | 2 |  | **2.08** |
| 16 |  | 6; 2 | 1 |  | 60.5 | 1 |  | Yes | 3 |  | 2.54 | 3 |  | 2.71 | 1 |  | 1.00 | 3 |  | 0.79 | 1 |  | **1.92** |
| 17 |  | 7; 3 | 2 |  | 138.0 | 2 |  | Yes | 3 |  | 2.47 | 2 |  | 2.62 | 1 |  | 1.00 | 3 |  | 0.79 | 1 |  | **1.77** |
| 18 |  | 6; 3 | 1 |  | 110.3 | 2 |  | Yes | 3 |  | 2.32 | 2 |  | 2.57 | 1 |  | 0.93 | 2 |  | 0.70 | 1 |  | **1.62** |
| 19 |  | 6; 3 | 1 |  | 51.2 | 1 |  | Yes | 3 |  | 2.64 | 3 |  | 2.46 | 1 |  | 1.00 | 3 |  | 0.60 | 1 |  | **1.92** |
| 20 |  | 6; 3 | 1 |  | 70.2 | 1 |  | Yes | 3 |  | 2.26 | 2 |  | 2.89 | 1 |  | 0.95 | 2 |  | 0.66 | 1 |  | **1.54** |
| 21 |  | 10; 4 | 3 |  | 78.8 | 1 |  | Yes | 3 |  | 2.61 | 3 |  | 4.02 | 3 |  | 0.96 | 2 |  | 1.43 | 2 |  | **2.46** |
| 22 |  | 10; 4 | 3 |  | 164.3 | 2 |  | Yes | 3 |  | 2.63 | 3 |  | 3.71 | 2 |  | 1.00 | 3 |  | 2.06 | 3 |  | **2.85** |
| 23 |  | 10; 4 | 3 |  | 119.0 | 2 |  | Yes | 3 |  | 2.69 | 3 |  | 4.00 | 2 |  | 0.94 | 2 |  | 2.25 | 3 |  | **2.77** |
| 24 |  | 10; 4 | 3 |  | 85.8 | 1 |  | Yes | 3 |  | 2.45 | 2 |  | 3.04 | 2 |  | 0.91 | 2 |  | 1.72 | 2 |  | **2.08** |
| 25 |  | 8; 4 | 2 |  | 102.0 | 1 |  | Yes | 3 |  | 2.25 | 2 |  | 3.51 | 2 |  | 0.79 | 2 |  | 1.25 | 2 |  | **2.00** |
| 26 |  | 10; 4 | 3 |  | 119.7 | 2 |  | Yes | 3 |  | 2.32 | 2 |  | 4.12 | 3 |  | 1.00 | 3 |  | 0.93 | 1 |  | **2.00** |
| 27 |  | 7; 3 | 2 |  | 68.3 | 1 |  | Yes | 3 |  | 1.95 | 1 |  | 3.19 | 2 |  | 0.50 | 1 |  | 1.13 | 1 |  | **1.31** |
| 28 |  | 10; 4 | 3 |  | 91.3 | 1 |  | Yes | 3 |  | 2.37 | 2 |  | 3.50 | 2 |  | 0.50 | 1 |  | 0.83 | 1 |  | **1.69** |
| 29 |  | 10; 4 | 3 |  | 164.7 | 2 |  | Yes | 3 |  | 2.67 | 3 |  | 3.98 | 2 |  | 0.67 | 1 |  | 1.33 | 2 |  | **2.38** |
| 30 |  | 9; 4 | 3 |  | 97.0 | 1 |  | Yes | 3 |  | 2.52 | 3 |  | 3.75 | 2 |  | 0.41 | 0 |  | 1.67 | 2 |  | **2.23** |
| ***Mean*** |  | **8.3; 3.5** | **2.23** |  | **123.7** | **1.6** |  | **--** | **3.00** |  | **2.41** | **2.27** |  | **3.48** | **2.00** |  | **0.91** | **2.33** |  | **1.35** | **1.67** |  | **2.07** |
| *Min.* |  | 4; 1 | 0 |  | 51.2 | 1 |  | -- | 3 |  | 1.95 | 1 |  | 2.46 | 1 |  | 0.41 | 0 |  | 0.53 | 1 |  | 1.31 |
| *Max.* |  | 10; 4 | 3 |  | 240.8 | 3 |  | -- | 3 |  | 2.74 | 3 |  | 4.46 | 3 |  | 1.00 | 3 |  | 2.33 | 3 |  | 2.87 |

a # of components; # of domains

| Key: | Scale score of Ideal (3) or Good (2) implementation: |  |
| --- | --- | --- |
|  | Scale score of Fair (1) or Limited/No (0) implementation: |  |
